## Correction

**Correction: Inhibition of ATM kinase upregulates levels of cell death induced by cannabidiol and  $\gamma$ -irradiation in human glioblastoma cells****Vladimir N. Ivanov<sup>1</sup>, Jinhua Wu<sup>1</sup>, Tony J.C. Wang<sup>1</sup> and Tom K. Hei<sup>1</sup>**<sup>1</sup>Center for Radiological Research, Department of Radiation Oncology, Vagelos College of Physicians and Surgeons, Columbia University, New York, NY 10032, USA*Published:* December 10, 2019**Copyright:** Ivanov et al. This is an open-access article distributed under the terms of the Creative Commons Attribution License 3.0 (CC BY 3.0), which permits unrestricted use, distribution, and reproduction in any medium, provided the original author and source are credited.**This article has been corrected:** Due to errors during figure assembly, the image used in Figure 3C is incorrect. In addition, the image for Figure 3A contains accidental duplication of FACS panels. The proper Figure 3 is shown below. The authors declare that these corrections do not change the results or conclusions of this paper.Original article: Oncotarget. 2019; 10:825–846. <https://doi.org/10.18632/oncotarget.26582>

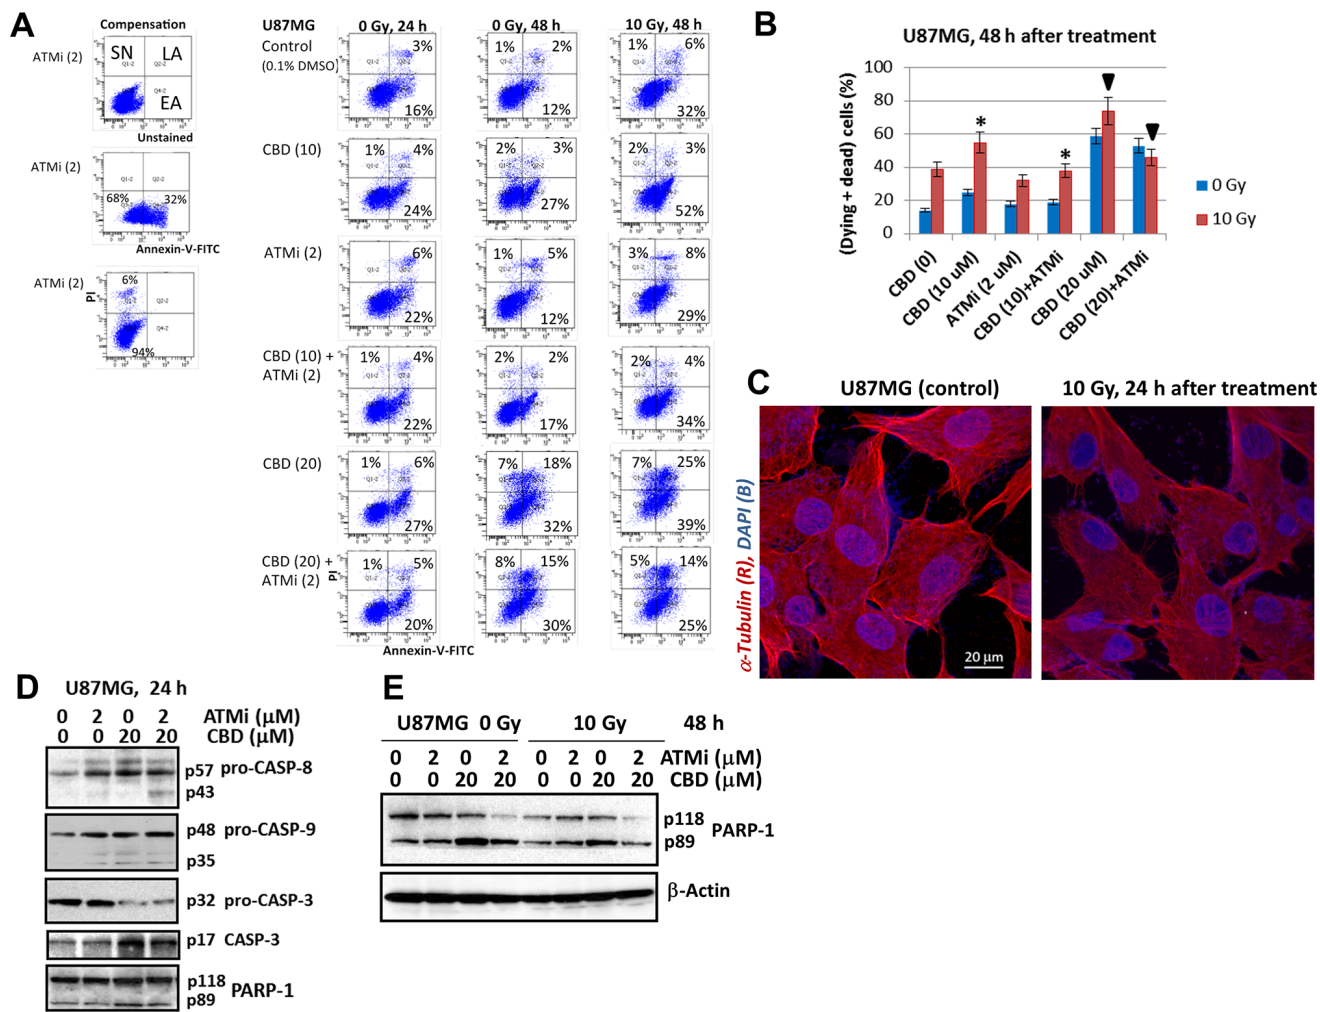

**Figure 3: The apoptotic commitment of U87MG after treatment with CBD (10-20 μM), ATMi (2 μM) and γ-irradiation (10 Gy), alone or in combinations.** (A and B) Annexin-V-FITC and PI staining for determination of early apoptotic (EA), late apoptotic (LA) and secondary-necrotic (SN) GBM cells after indicated treatment was followed by the flow cytometry. Typical experiment (A) and pooled results of four independent experiments (B) using U87MG cells 24-48 h after indicated treatments are shown. Percentage of (dying + dead) cells included early apoptotic (EA), late apoptotic (LA) and secondary necrotic cells (SN). Error bars represent means ± S.D. ( $p < 0.05$ , Student's t-test). The stars and the arrows indicate significant differences between indicated cells after specified treatment. (C) The images of control and irradiated U87MG after immunostaining with α-Tubulin and DAPI followed by confocal microscopy are shown. (D and E) Western blot analysis of apoptotic marker proteins 24 h and 48 h after indicated treatments of U87MG cells.
